# Supplementary material for: Baseline immune profile by CyTOF can predict response to an investigational adjuvanted vaccine in elderly adults
Source: PubMed Central journal article supplement (PMC5987461; doi:10.1186/s12967-018-1528-1), 2018-06-05

**A****RSV**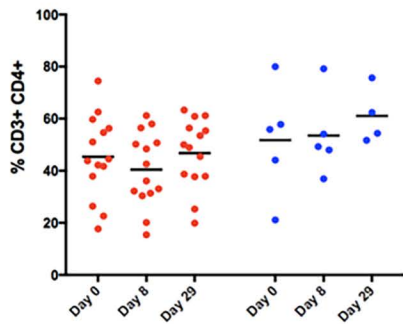**B****RSV**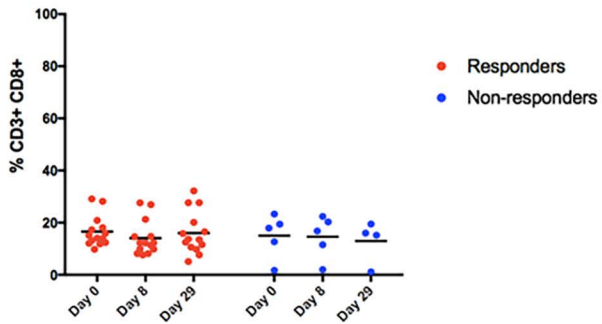

Supplement: 12967_2018_1528_MOESM3_ESM.pdf [file 12967_2018_1528_MOESM3_ESM.pdf]
