# Supplementary material for: Baseline immune profile by CyTOF can predict response to an investigational adjuvanted vaccine in elderly adults
Source: Springer Nature journal article supplement (doi:10.1186/s12967-018-1528-1), 2018-06-05
Supplement: MOESM4 [file 15821688]

Boolean 'OR' gates generated for both CD4+ and CD8+ T cell populations (RSV condition)

Markers: CD107a+, IFNg+, TNFa+, IL-4+

Fcs files concatenated in FlowJo v10.1

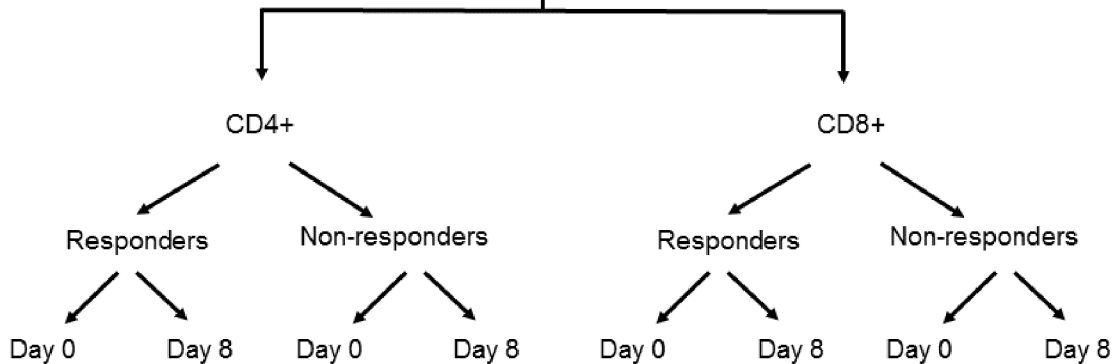

Total 4 concatenated files for each T cell population

Cytobank - viSNE analysis (performed separately for CD4+ and CD8+ T cells)
